# Supplementary material
Source: publisher figshare collection journal article supplement (https://acs.figshare.com/ndownloader/files/13247675)
Supplement: Supplementary file 1 [file 13247675]

## Supporting Information

### Solution-Processable Cu(II) Phthalocyanine Derivative as Dopant-Free Hole Transport Layer for Efficient and Low-Cost Rutile TiO<sub>2</sub> Array-Based Perovskite Solar Cells

Shufang Wu, Chi Chen, Qingwei Liu, Tianyou Peng,\* Renjie Li,\* and Jing Zhang

*College of Chemistry and Molecular Sciences, Wuhan University, Wuhan 430072, PR China.*

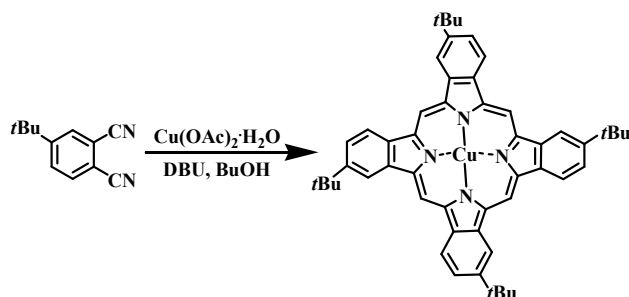

**Figure S1.** Synthetic route of CuPc(*t*Bu)<sub>4</sub>.

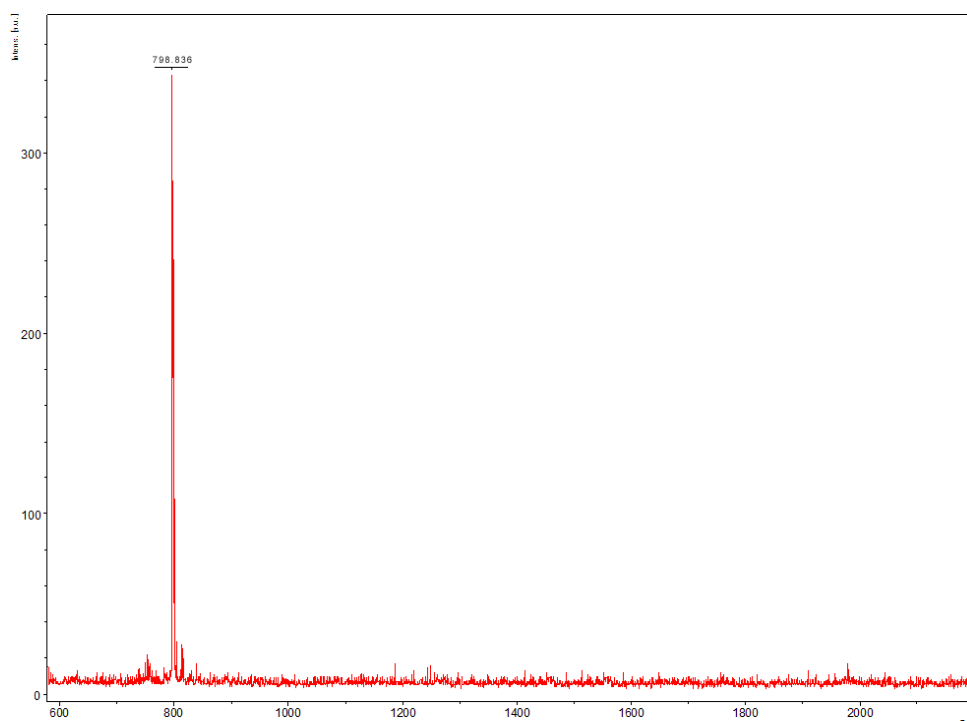

**Figure S2.** MALDI-TOF mass spectrum of molecular ion of CuPc(*t*Bu)<sub>4</sub>.

\* Corresponding authors.

*E-mail:* typeng@whu.edu.cn (T. Y. Peng); lirj@whu.edu.cn (R. J. Li).

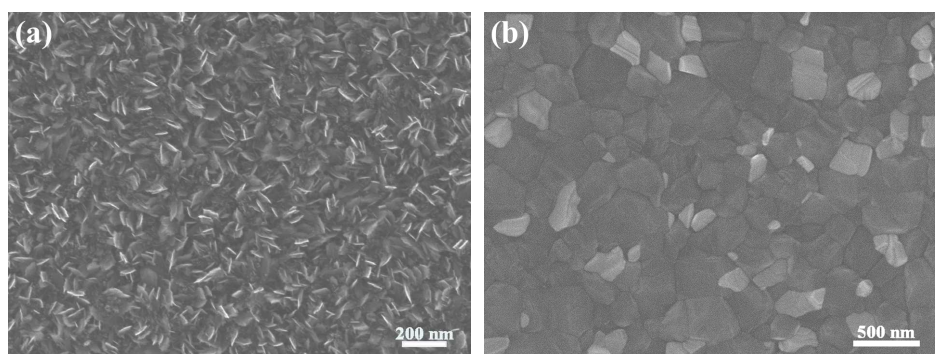

**Figure S3.** Top-view FESEM images of the RTA (a) and perovskite/RTA (b) films.

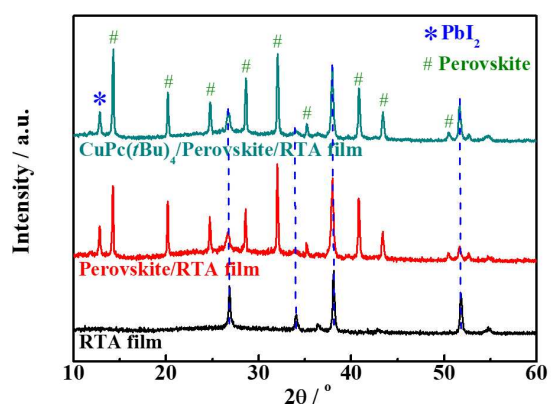

**Figure S4.** X-ray diffraction (XRD) patterns of RTA, perovskite/RTA and CuPc(*t*Bu)<sub>4</sub>/perovskite/RTA films.

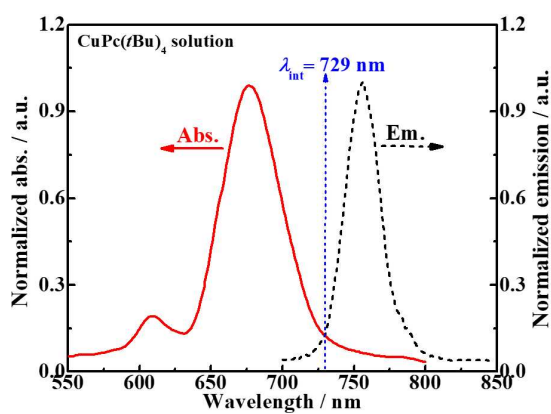

**Figure S5.** Normalized UV-vis absorption and PL spectra of  $1.0 \times 10^{-3}$  M CuPc(*t*Bu)<sub>4</sub> DMF solution.

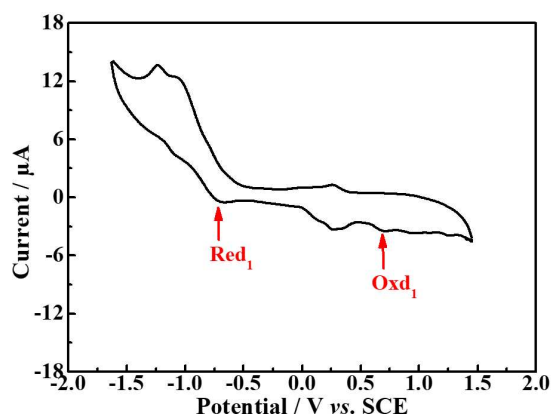

**Figure S6.** Cyclic voltammogram (CV) curve of CuPc(*t*Bu)<sub>4</sub> solution.

**Table S1.** Calculated Data of Optical and Electrochemical Properties of CuPc(*t*Bu)<sub>4</sub>

| Dye                             | $E_{1/2}$ /V vs. SCE |       | $E_{0-0}$<br>/eV | $E_{\text{HOMO}}^a$<br>/eV | $E_{\text{LUMO}}^b$<br>/eV |
|---------------------------------|----------------------|-------|------------------|----------------------------|----------------------------|
|                                 | Ox                   | Red   |                  |                            |                            |
| CuPc( <i>t</i> Bu) <sub>4</sub> | 0.49                 | -0.92 | 1.70             | -5.20                      | -3.50                      |

<sup>a</sup> Calculated with the equation  $E_{\text{HOMO}} = -(E_{\text{ox}} + 4.71)$  eV, <sup>b</sup> Calculated with the equation  $E_{\text{LUMO}} = (E_{\text{HOMO}} + E_{0-0})$  eV.

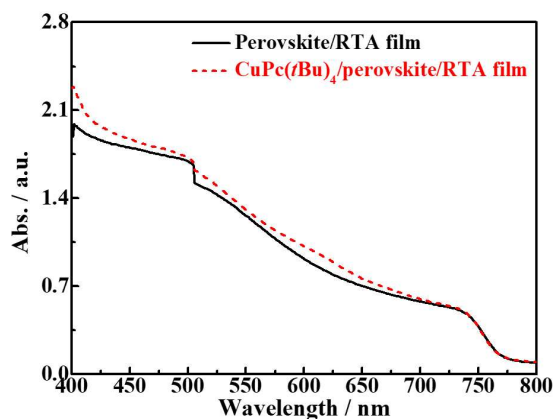

**Figure S7.** UV-Vis diffuse reflectance absorption spectra (DRS) of perovskite/RTA and CuPc(*t*Bu)<sub>4</sub>/perovskite/RTA films.

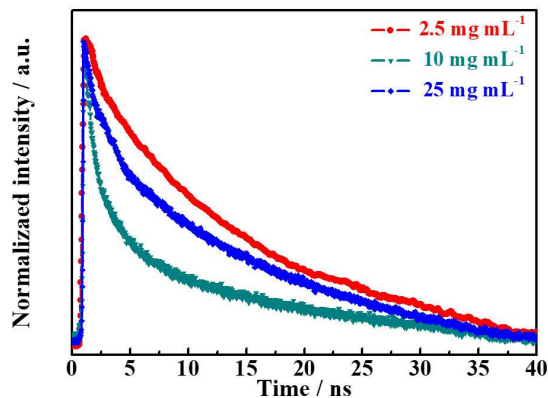

**Figure S8.** Time-resolved photoluminescence (TRPL) spectra of the PSCs with CuPc(*t*Bu)<sub>4</sub> as HTLs that were spin-coated using CuPc(*t*Bu)<sub>4</sub> solutions with different concentrations.

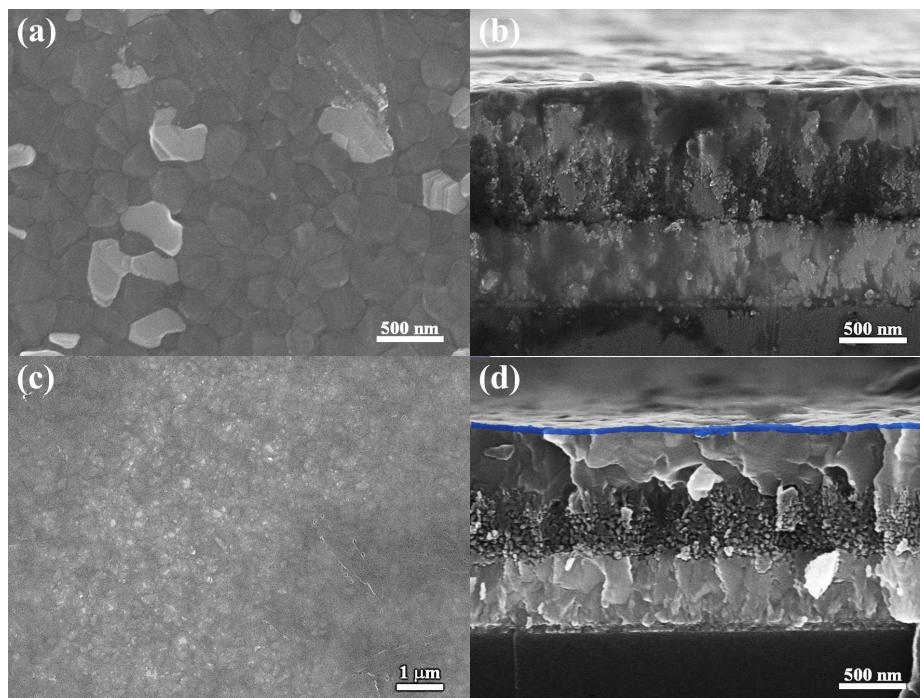

**Figure S9.** Top-view and cross-sectional FESEM images of the  $\text{Al}_2\text{O}_3$  layer (a, b) and  $\text{CuPc}(t\text{Bu})_4/\text{Al}_2\text{O}_3$  layer (c, d) on the perovskite/RTA film.  $\text{CuPc}(t\text{Bu})_4$  HTL was spin-coated by using  $20 \text{ mg mL}^{-1}$   $\text{CuPc}(t\text{Bu})_4$  solution.

**Table S2. Photovoltaic Performance Parameters of the 15 PSCs Fabricated with  $\text{CuPc}(t\text{Bu})_4$  as HTL by Spin-Coating  $10 \text{ mg mL}^{-1}$   $\text{CuPc}(t\text{Bu})_4$  Solution Measured under Forward Scanning Mode**

| Number  | $J_{\text{sc}}$<br>( $\text{mA cm}^{-2}$ ) | $V_{\text{oc}}$<br>(V) | FF<br>(%)      | PCE<br>(%)     |
|---------|--------------------------------------------|------------------------|----------------|----------------|
| 1       | 22.0                                       | 1.01                   | 62             | 13.7           |
| 2       | 22.5                                       | 1.03                   | 54             | 12.5           |
| 3       | 21.7                                       | 1.06                   | 57             | 13.2           |
| 4       | 19.4                                       | 1.01                   | 56             | 10.9           |
| 5       | 20.1                                       | 1.02                   | 62             | 12.8           |
| 6       | 20.8                                       | 1.06                   | 53             | 11.6           |
| 7       | 21.1                                       | 1.03                   | 61             | 13.3           |
| 8       | 19.7                                       | 1.04                   | 58             | 11.8           |
| 9       | 21.4                                       | 1.02                   | 58             | 12.6           |
| 10      | 22.1                                       | 1.04                   | 60             | 13.7           |
| 11      | 20.8                                       | 1.04                   | 58             | 12.5           |
| 12      | 21.2                                       | 1.04                   | 57             | 12.6           |
| 13      | 20.6                                       | 1.01                   | 62             | 12.9           |
| 14      | 21.4                                       | 1.05                   | 56             | 12.7           |
| 15      | 21.8                                       | 1.05                   | 58             | 13.3           |
| Average | $21.1 \pm 0.9$                             | $1.03 \pm 0.02$        | $58.1 \pm 2.8$ | $12.7 \pm 0.8$ |

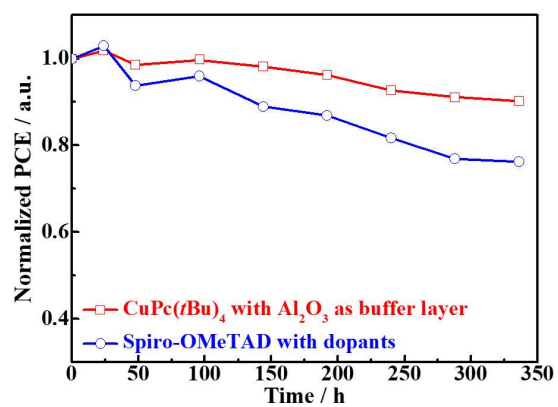

**Figure S10.** Stability tests for the PSCs fabricated with dopant-free CuPc(*t*Bu)<sub>4</sub> and doped spiro-OMeTAD as HTM layer. Those devices without encapsulations were stored at ambient condition in the dark at room temperature with a humidity of ~30%.
